# Supplementary material
Source: HighWire-hosted journal article supplement (https://bmjopen.bmj.com/content/11/6/e047948)
Supplement: inline-supplementary-material-1 [file inline-supplementary-material-1.pdf]

# Concept Mapping Workshop 1

## Workshop guide

### Introduction

- Introductions and workshop objectives presentations
- Divide the participants into three groups for the sessions work.
- Equip groups with essential materials: colored stick-notes and markers, flip charts.

### Session 1 - Identifying the bottlenecks in the current TB program in Georgia

**Objective:** to identify the bottlenecks to successful TB treatment outcomes?

**Facilitators probe for:**

- Are the bottlenecks different for different patient sub-groups? Other differences: urban vs. rural setting, public vs private providers. Are there specific vulnerable groups or populations?
- What factors are driving the differences?
- What do we need to add? (Nodes on diagram to be added)
- What needs to be taken away? (Which bottlenecks are not relevant?)
- What data bottlenecks exist?

**Timing:** 10 minutes to write the factors they consider impeding TB care on post-its. 10 minutes for facilitators to explain participants patient pathway framework created by Vassal et al and adapted for the workshop. 40 minutes to position participants post its on a large print-out of the patient pathway, and a discussion stimulated by facilitators where necessary.

### Session 2 – Identifying the different options and/or combinations of solutions

**Objective:** to identify the different options and/or combinations of solutions to address existing bottlenecks in TB care system.

**Facilitators probe for:**

- Packages: what are the targets: drug resistant vs. not drug resistant TB, urban vs. rural? Are they the same geographically? Are there specific vulnerable groups or populations?
- How do the solutions address the bottlenecks? Explain the causal pathway/links
- From the supply side, what can we do?
- Try to contextualize your solutions
- Think about the patient motivation for (non-)adherence

**Timing:** 15 minutes for participants to list identified solutions on stick-notes and put on the print-out of the patient pathway. An hour for group work presentations and discussions.

### Session 3: Summing up bottlenecks and potential solutions by workshop organizers

**Objective:** to synthesise key bottlenecks and potential solutions presented and discussed by workshop participants.

**Timing:** 30 minutes for presentation and 30 minutes for discussion.

### Session 4: Prioritizing solutions

**Objective:** the groups built on their problem analysis to prioritize the solutions

**Question asked during the session:** Which of your options is your priority solution?

**Facilitators explaining the prioritization criteria:**

Effectiveness, cost-effectiveness, acceptability, feasibility (technical, political, financial, implementation), affordability, sustainability, side-effects, equity

**Facilitators probe for:**

Regarding the financial incentives, what options should we look into? Is the financial incentive sufficiently comprehensive in itself? What are the minimal conditions for it to work?

**Timing:** 30 minutes for work in the small groups and 40 minutes for presentations and discussions.
