# Supplementary material
Source: HighWire-hosted journal article supplement (https://bmjopen.bmj.com/content/11/6/e047948)
Supplement: inline-supplementary-material-2 [file inline-supplementary-material-2.pdf]

## Concept Mapping Workshop 2

### Workshop guide

#### Introduction

- Opening the meeting and introducing its objectives
- Briefing the audience about the development since the 1<sup>st</sup> workshop
- Dividing the audience into small working groups

#### Session 1 - Intervention concept design presentation

**Objective:** introduce the intervention design with workshop participants and get their insights on the issues discussed during the session:

**Presentation topics:**

Problems what will be tackled by the Intervention

- Intervention definition
- Target population of the intervention and level of treatment it will be introduced
- Primary & Secondary outcomes
- Types of intervention
  1. Model for PHC facilities where TB units are physically integrated,
  2. Model for non integrated TB facilities into PHC.
- Intervention components:
  - Roles and responsibilities among medical personnel
  - Patient individual treatment plan
  - Training for family doctor and specialists for side-effects management
  - RBF incentives
- Integrated care team roles under the intervention (list of new and routine roles they will be responsible for conducting)
- Incentives amount per patient for different members of the team.
  - Incentives calculation by type of models and type of providers

The audience was asked to raise questions for clarification. The audience was interested to get more information on:

- Rural doctor's enrollment in the team
- Indicators for bonus payment
- Verification system

Session 2 - Identifying expected effects of the intervention and processes and mechanisms that would help the intervention to reach the final goal.

**Part 1.** The first part of group work requires individual work from each participant

Participants were asked to provide their thought about **expected effects** or results of the intervention:

- positive and negative,
- short-term and long-term

**Timing:** 10 minutes to think about this question and write down their responses on the red and green colored stick-notes (red for negative, green for positive effects demonstration). 50 minutes for posting the responses on the flip chart and discussions around argumentation of their positions.

**Part 2.** Second part of the group work implies teamwork from workshop participants.

**The first task:** think about processes and mechanisms that would help the intervention to reach the final goal.

*To facilitators:*

- *Define definitions of processes and mechanisms to the participants.*
- *Use the prepared flip charts that outlined different factors and levels of operation*

**The second task:** to define essential conditions for the policy and contextual constraints.

**Timing:** 30 minutes to think about questions and discuss internally within the groups and 45 minutes for group work presentations and followed discussions.
